# Supplementary material
Source: PubMed Central journal article supplement (PMC4416058)
Supplement: NIHMS681874-supplement-Supplemental.pdf [file NIHMS681874-supplement-Supplemental.pdf]

**Table S1:** Phenotypic correlations among traits across different environmental conditions

| Variable                             | Control |        |       |      | Cold acclimation |        |        |       | Freezing treatment |        |        |        | 1 day post freezing treatment |        |       |       | outdoor environment |       |   |
|--------------------------------------|---------|--------|-------|------|------------------|--------|--------|-------|--------------------|--------|--------|--------|-------------------------------|--------|-------|-------|---------------------|-------|---|
|                                      | 1       | 2      | 3     | 4    | 1                | 2      | 3      | 4     | 1                  | 2      | 3      | 4      | 1                             | 2      | 3     | 4     | 1                   | 2     | 3 |
| <b>Control</b>                       |         |        |       |      |                  |        |        |       |                    |        |        |        |                               |        |       |       |                     |       |   |
| 1. LT <sub>50</sub> (SD)             | 1       |        |       |      |                  |        |        |       |                    |        |        |        |                               |        |       |       |                     |       |   |
| 2. LT <sub>50</sub> (LD)             | .73**   | 1      |       |      |                  |        |        |       |                    |        |        |        |                               |        |       |       |                     |       |   |
| 3. Fv/Fm (SD)                        | -.17    | -.11   | 1     |      |                  |        |        |       |                    |        |        |        |                               |        |       |       |                     |       |   |
| 4. Fv/Fm (LD)                        | -.08    | -.09   | -.09  | 1    |                  |        |        |       |                    |        |        |        |                               |        |       |       |                     |       |   |
| <b>Cold acclimation</b>              |         |        |       |      |                  |        |        |       |                    |        |        |        |                               |        |       |       |                     |       |   |
| 1. LT <sub>50</sub> (SD)             | .67**   | .62**  | -.10  | .01  | 1                |        |        |       |                    |        |        |        |                               |        |       |       |                     |       |   |
| 2. LT <sub>50</sub> (LD)             | .68**   | .67**  | -.07  | .02  | .95**            | 1      |        |       |                    |        |        |        |                               |        |       |       |                     |       |   |
| 3. Fv/Fm (SD)                        | -.29**  | -.22*  | .19*  | -.04 | -.28**           | -.18   | 1      |       |                    |        |        |        |                               |        |       |       |                     |       |   |
| 4. Fv/Fm (LD)                        | -.19    | -.14   | .42** | -.05 | -.16             | -.12   | .26**  | 1     |                    |        |        |        |                               |        |       |       |                     |       |   |
| <b>Freezing treatment</b>            |         |        |       |      |                  |        |        |       |                    |        |        |        |                               |        |       |       |                     |       |   |
| 1. EL (SD)                           | .69**   | .65**  | -.15  | -.01 | .86**            | .83**  | -.33** | -.22* | 1                  |        |        |        |                               |        |       |       |                     |       |   |
| 2. EL (LD)                           | .68**   | .65**  | -.14  | -.01 | .80**            | .81**  | -.30** | -.19  | .85**              | 1      |        |        |                               |        |       |       |                     |       |   |
| 3. Fv/Fm (SD)                        | -.63**  | -.60** | .14   | -.04 | -.91**           | -.86** | .29**  | .18   | -.93**             | -.79** | 1      |        |                               |        |       |       |                     |       |   |
| 4. Fv/Fm (LD)                        | -.63**  | -.57** | .07   | .04  | -.77**           | -.80** | .26**  | .17   | -.79**             | -.84** | .77**  | 1      |                               |        |       |       |                     |       |   |
| <b>1 day post freezing treatment</b> |         |        |       |      |                  |        |        |       |                    |        |        |        |                               |        |       |       |                     |       |   |
| 1. EL (SD)                           | .69**   | .61**  | -.11  | -.03 | .874**           | .86**  | -.32** | -.18  | .91**              | .82**  | -.89** | -.77** | 1                             |        |       |       |                     |       |   |
| 2. EL (LD)                           | .63**   | .54**  | -.16  | -.01 | .844**           | .86**  | -.32** | -.19* | .84**              | .84**  | -.85** | -.80** | .88**                         | 1      |       |       |                     |       |   |
| 3. Fv/Fm (SD)                        | -.66**  | -.59** | .10   | .07  | -.825**          | -.80** | .34**  | .17   | -.87**             | -.82** | .83**  | .69**  | -.95**                        | -.85** | 1     |       |                     |       |   |
| 4. Fv/Fm (LD)                        | -.62**  | -.51** | .17   | -.00 | -.808**          | -.81** | .35**  | .19*  | -.83**             | -.80** | .84**  | .78**  | -.89**                        | -.97** | .86** | 1     |                     |       |   |
| <b>Outdoor environment</b>           |         |        |       |      |                  |        |        |       |                    |        |        |        |                               |        |       |       |                     |       |   |
| 1. Overall winter damage             | -.08    | -.16   | -.05  | .01  | -.06             | -.06   | .01    | -.03  | -.01               | -.05   | .03    | -.08   | -.03                          | .05    | .05   | -.05  | 1                   |       |   |
| 2. Fv/Fm (MF)                        | -.13    | -.23*  | .11   | -.08 | -.20*            | -.23*  | .26**  | .14   | -.20*              | -.21*  | .23*   | .18    | -.21*                         | -.23*  | .20*  | -.23* | .40**               | 1     |   |
| 3. Fv/Fm (SF)                        | -.06    | -.16   | -.05  | -.14 | -.12             | -.12   | .21*   | .04   | -.05               | -.11   | .10    | .06    | -.07                          | -.04   | .06   | .04   | .69**               | .56** | 1 |

\*\* means correlation is significant at the 0.01 level (2-tailed) and \* means correlation is significant at the 0.05 level (2-tailed).

SD ; short day, LD ; long day, MF : mild freezing (Jan., 2012), SF : severe freezing (Feb., 2012)

**Table S2:** Summary of putative QTLs controlling freezing tolerant and photosynthetic performance related traits in the multi-trait QTL model

| Condition | Linkage group | Locus name | Position | LOD Score | Traits | Add.eff. | High value allele | % Expl. Var. | P    | s.e. |
|-----------|---------------|------------|----------|-----------|--------|----------|-------------------|--------------|------|------|
| SD_CA     | 4             | At2g36390  | 83.33    | 4.30      | LT50   | 0.03     | LTM               | 15.50        | 0.00 | 0.00 |
|           |               |            |          |           | Fv/Fm  | 0.00     | LTM               | 2.60         | 0.07 | 0.00 |
|           | 7             | Bst001405  | 83.33    | 5.99      | LT50   | 0.02     | LTM               | 5.40         | 0.01 | 0.00 |
|           |               |            |          |           | Fv/Fm  | 0.00     | LTM               | 21.70        | 0.00 | 0.00 |
| LD_CA     | 4             | At2g36390  | 83.33    | 4.58      | LT50   | 0.02     | LTM               | 11.70        | 0.00 | 0.00 |
|           |               |            |          |           | Fv/Fm  | 0.00     | LTM               | 5.60         | 0.00 | 0.00 |
|           | 7             | Bst001405  | 83.33    | 7.11      | LT50   | 0.01     | LTM               | 4.40         | 0.03 | 0.00 |
|           |               |            |          |           | Fv/Fm  | 0.00     | LTM               | 22.90        | 0.00 | 0.00 |
| SD_FT     | 2             | MAF1       | 121.88   | 3.82      | EL     | 0.00     | LTM               | 0.00         | 0.96 | 0.01 |
|           |               |            |          |           | Fv/Fm  | 0.00     | SAD12             | 1.00         | 0.26 | 0.00 |
|           | 3             | A10        | 92.74    | 12.92     | EL     | 0.02     | SAD12             | 3.90         | 0.03 | 0.01 |
|           |               |            |          |           | Fv/Fm  | 0.01     | LTM               | 12.20        | 0.00 | 0.00 |
| 4         | At2g36390     | 83.33      | 3.79     | EL        | 0.04   | SAD12    | 12.80             | 0.00         | 0.01 |      |
|           |               |            |          | Fv/Fm     | 0.01   | LTM      | 8.60              | 0.00         | 0.00 |      |
| LD_FT     | 4             | At2g36390  | 83.33    | 3.53      | EL     | 0.03     | SAD12             | 10.80        | 0.00 | 0.01 |
|           |               |            |          |           | Fv/Fm  | 0.01     | LTM               | 14.10        | 0.00 | 0.00 |
| SD_1DPF   | 4             | At2g36390  | 83.33    | 4.56      | EL     | 0.07     | SAD12             | 17.50        | 0.00 | 0.01 |
|           |               |            |          |           | Fv/Fm  | 0.03     | LTM               | 12.20        | 0.00 | 0.01 |
| LD_1DPF   | 4             | At2g36390  | 83.33    | 4.76      | EL     | 0.07     | SAD12             | 18.20        | 0.00 | 0.01 |
|           |               |            |          |           | Fv/Fm  | 0.05     | LTM               | 13.90        | 0.00 | 0.01 |

SD ; short day, LD ; long day, CA ; cold acclimation, FT ; freezing treatment, 1DF : 1 day post freezing treatment
